# Supplementary material
Source: PubMed Central journal article supplement (PMC526469)
Supplement: 7600454s1.pdf [file 7600454s1.pdf]

**Supplementary data: Table I.** SAGE analysis, LIF-specific genes.

| SAGE Tag    | Control | LIF | NRG-1 | AngII | Aldo | LL ID  | Unigene   | Gene Name                                                      |
|-------------|---------|-----|-------|-------|------|--------|-----------|----------------------------------------------------------------|
| GTATTGAAAA  | 1       | 20  | 9     | 5     | 5    | 76745  | Mm.154109 | RIKEN cDNA 1810009F10 gene                                     |
| TTTGTAACATA | 3       | 46  | 17    | 23    | 5    | 68029  | Mm.32247  | RIKEN cDNA 2010203O03 gene                                     |
| GTTATGTTTG  | 0       | 13  | 1     | 3     | 0    | 27428  | Mm.46014  | shroom                                                         |
| ATTGTAGATG  | 4       | 45  | 21    | 10    | 4    | 14694  | Mm.5305   | guanine nucleotide binding protein, beta 2, related sequence 1 |
| TTTATCCTTG  | 0       | 10  | 2     | 0     | 0    | 16412  | Mm.4712   | integrin beta 1 (fibronectin receptor beta)                    |
| TTCTATGCCT  | 1       | 10  | 2     | 3     | 0    |        | Mm.45149  | ESTs                                                           |
| GTTTCAAGGT  | 4       | 39  | 13    | 18    | 7    | 67115  | Mm.43749  | RIKEN cDNA 3100001N19 gene                                     |
| CTAAAAAAA   | 4       | 28  | 14    | 4     | 15   | 68275  | Mm.180734 | RIKEN cDNA 5031405K23 gene                                     |
| CTGCTTCAAT  | 3       | 17  | 7     | 2     | 3    |        | Mm.100622 | ESTs                                                           |
| CTGCTTCAAT  | 3       | 17  | 7     | 2     | 3    | 76356  | Mm.18249  | RIKEN cDNA 2610027H02 gene                                     |
| CTGCTTCAAT  | 3       | 17  | 7     | 2     | 3    |        | Mm.210150 | ESTs                                                           |
| ACCAGATGCT  | 5       | 25  | 8     | 4     | 1    | 20753  | Mm.625    | small proline-rich protein 1A                                  |
| AACCATGAAG  | 0       | 5   | 0     | 0     | 0    | 19646  | Mm.12145  | retinoblastoma binding protein 4                               |
| CTGCCACTGC  | 0       | 5   | 0     | 0     | 0    | 56361  | Mm.23653  | pseudouridine synthase 1                                       |
| CACAATCCAG  | 0       | 5   | 0     | 0     | 0    | 67185  | Mm.193688 | RIKEN cDNA 2700059D21 gene                                     |
| GTAGAACTTG  | 0       | 5   | 0     | 0     | 0    | 11469  | Mm.116989 | actin-like                                                     |
| GTAGAACTTG  | 0       | 5   | 0     | 0     | 0    | 11465  | Mm.196173 | actin, gamma, cytoplasmic                                      |
| TTTTTTATAC  | 4       | 14  | 5     | 2     | 2    | 12567  | Mm.6839   | cyclin-dependent kinase 4                                      |
| CAGGAGTTCA  | 74      | 23  | 66    | 55    | 65   | 67268  | Mm.29057  | RIKEN cDNA 2900073G15 gene                                     |
| CAGGAGTTCA  | 74      | 23  | 66    | 55    | 65   | 67938  | Mm.196536 | RIKEN cDNA 1500001M02 gene                                     |
| AGGAGCAGGC  | 35      | 10  | 20    | 25    | 29   | 69669  | Mm.21864  | RIKEN cDNA 2310075E07 gene                                     |
| CAGGACCCAG  | 39      | 11  | 25    | 26    | 39   | 14314  | Mm.22763  | folliculin-like                                                |
| CAGGACCCAG  | 39      | 11  | 25    | 26    | 39   |        | Mm.173253 | ESTs                                                           |
| TGGTGTCCCT  | 13      | 3   | 12    | 15    | 17   | 17096  | Mm.1834   | Yamaguchi sarcoma viral (v-yes-1) oncogene homolog             |
| TGGTGAGAGG  | 9       | 1   | 8     | 11    | 7    | 76563  | Mm.5904   | RIKEN cDNA 2700038P16 gene                                     |
| ACCAAACCT   | 35      | 2   | 16    | 26    | 55   |        | Mm.214965 | synaptosomal-associated protein, 25 kDa                        |
| GTCTAATCAC  | 32      | 1   | 12    | 19    | 10   | 18823  | Mm.1268   | proteolipid protein (myelin)                                   |
| GTGCTTTCTG  | 16      | 0   | 5     | 9     | 27   | 233489 | Mm.218602 | MGC19382 Hypothetical protein                                  |
| AGAGCTGGGA  | 12      | 0   | 5     | 12    | 9    | 65970  | Mm.182607 | epithelial protein lost in neoplasm                            |
| AGAGCTGGGA  | 12      | 0   | 5     | 12    | 9    |        | Mm.87267  | ESTs                                                           |
| AGGGCGACAC  | 16      | 0   | 8     | 13    | 19   | 11747  | Mm.1620   | annexin A5                                                     |
| CTGCAAGGCT  | 10      | 0   | 7     | 8     | 6    | 20597  | Mm.4628   | sphingomyelin phosphodiesterase 1, acid lysosomal              |
| TCCTCTTTGG  | 7       | 0   | 11    | 9     | 6    | 17906  | Mm.1529   | myosin light chain, phosphorylatable, cardiac ventricles       |
| AGTGTGAGTG  | 6       | 0   | 5     | 5     | 3    | 52693  | Mm.196527 | DNA segment, Chr 10, ERATO Doi 625, expressed                  |

Note: Number of SAGE tags found in each of the 5 libraries is indicated.
