# Supplementary material
Source: PubMed Central journal article supplement (PMC526469)
Supplement: 7600454s2.pdf [file 7600454s2.pdf]

**Supplementary data: Table II.** Genes differentially regulated in gp130 heart-knock-out mice after bio-mechanical stress.

| AccNum   | LocusLink | Gene Name                                               | Fold changes       |                    |                   |
|----------|-----------|---------------------------------------------------------|--------------------|--------------------|-------------------|
|          |           |                                                         | wt TAC vs. wt sham | ko TAC vs. ko sham | ko TAC vs. wt TAC |
| AJ005559 | 20755     | small proline-rich protein 2A                           | 17.75311           | 1.197479           | -12.8171          |
| AJ005560 | 20756     | small proline-rich protein 2B                           | 4.316913           | 1.274561           | -4.92458          |
| X94998   | 14264     | fibromodulin                                            | 17.87659           | 1.879045           | -3.97237          |
| AJ005559 | 20755     | small proline-rich protein 2A                           | 4.055838           | -1.03526           | -3.91768          |
| AF057156 | 20753     | small proline-rich protein 1A                           | 29.85706           | 8.938297           | -3.45815          |
| AW124134 |           |                                                         | 2.188587           | -1.19748           | -3.09513          |
| X04673   | 11537     | adipsin                                                 | 2.265768           | -2.11404           | -2.46229          |
| AW124049 | 52331     | DNA segment, Chr 5, ERATO Doi 593, expressed            | 2.234574           | 1.404445           | -2.44528          |
| AW227545 |           |                                                         | 2.80889            | -1.00696           | -2.09943          |
| AV003873 | 28201     | DNA segment, Chr 14, University of Calif. Los Angeles 3 | 4.346939           | 1.658639           | -2.08493          |
| AI844507 | 66251     | RIKEN cDNA 1810004P07 gene                              | 2.378414           | 1.132884           | -2.04202          |
| L04961   | 22438     | inactive X specific transcripts                         | 3.506423           | 1.109569           | -2.01391          |
| X58196   | 14955     | H19 fetal liver mRNA                                    | 3.680751           | 1.591073           | -1.97247          |
| K02781   | 18157     | natriuretic peptide precursor type A                    | 7.012846           | 2.789487           | -1.85318          |
| AW046032 | 14062     | coagulation factor II (thrombin) receptor               | 2.675855           | 1.765406           | -1.82766          |
| AV366654 | 76293     | RIKEN cDNA 1110007F23 gene                              | 6.364292           | 3.24901            | -1.69349          |
| U13705   | 14778     | glutathione peroxidase 3                                | 2.514027           | 1.189207           | -1.67018          |
| X12973   | 17901     | myosin light chain, alkali, fast skeletal muscle        | 3.917681           | 1.70527            | -1.65864          |
| D14077   | 12759     | clusterin                                               | 3.5801             | 1.765406           | -1.65864          |
| AF058798 | 55948     | makorin, ring finger protein, 3                         | 2.602684           | 1.505247           | -1.65864          |
| AW228316 | 76453     | RIKEN cDNA 2310046G15 gene                              | 3.138336           | 2.234574           | -1.65864          |
| AI853802 | 56421     | phosphofructokinase, platelet                           | 3.010493           | 1.879045           | -1.64718          |
| U44088   | 21664     | T-cell death associated gene                            | 2.20381            | -1.12506           | -1.55833          |
| U88566   | 20377     | secreted frizzled-related sequence protein 1            | 3.706352           | 2.114036           | -1.55833          |
| M16238   |           |                                                         | 2.566852           | 1.958841           | -1.54756          |
| M60474   | 17118     | myristoylated alanine rich protein kinase C substrate   | 2.751084           | 1.905276           | -1.52626          |
| D29639   | 15107     | L-3-hydroxyacyl-Coenzyme A dehydrogenase, short chain   | -3.03143           | -2.01391           | 1.526259          |
| AI648018 | 72479     | RIKEN cDNA 2610207I16 gene                              | -2.53151           | -1.70527           | 1.526259          |
| AW121468 | 13643     | ephrin B3                                               | -2.77022           | -1.77769           | 1.536875          |
| AB013345 | 16527     | potassium channel, subfamily K, member 3                | -2.49666           | -1.56917           | 1.558329          |
| AI505355 | 15464     | histidine rich calcium binding protein                  | -3.50642           | -2.26577           | 1.569168          |
| AF030343 | 51798     | enoyl coenzyme A hydratase 1, peroxisomal               | -2.39496           | -1.59107           | 1.591073          |
| AV375788 | 81877     | tenascin XB                                             | -2                 | -1.06437           | 1.70527           |
| AJ001418 | 27273     | pyruvate dehydrogenase kinase 4                         | -2.8481            | -1.23114           | 2                 |
| AJ007376 | 26900     | DEAD box polypeptide, Y chromosome                      | -103.968           | -1.69349           | 60.54769          |

Note: wt = wild-type mice, ko = gp130 cardiomyocyte-restricted conditional knockout mice, TAC = mice with transverse thoracic aortic constriction, sham = sham operated mice.
