# Supplementary material
Source: PubMed Central journal article supplement (PMC526469)
Supplement: 7600454s3.pdf [file 7600454s3.pdf]

**Supplementary data: Table IV.** Cell signaling and hypertrophic response after TAC.

| Mice       | pSTAT3 | pERK1/2 | p-pP38 | LV/BW [%] | P.G. [mmHg] | DNA chip |
|------------|--------|---------|--------|-----------|-------------|----------|
| 1h-1       | ++     | ++      | ++     | 0.36      | 51.4        | *        |
| 1h-2       | ++     | ++      | +/-    | 0.38      | 49.1        | *        |
| 1h-5       | +      | +       | ++     | 0.32      | 27.1        |          |
| 1h-sh1     | +/-    | +/-     | +      | 0.36      |             | *        |
| 1h-sh2     | +/-    | +/-     | ++     | 0.32      |             | *        |
| 5h-1       | +      | +       | ++     | 0.33      | 31.4        |          |
| 5h-2       | +/-    | +       | ++     | 0.38      | 65.9        | *        |
| 5h-3       | +/-    | +       | ++     | 0.33      | 76          | *        |
| 5h-4       | +/-    | +       | +/-    | 0.32      | 41.5        |          |
| 5h-sh1     | +      | +       | +/-    | 0.33      |             | *        |
| 5h-sh2     | +/-    | +       | +/-    | 0.32      |             | *        |
| 20h-1      | +      | +/-     | ++     | 0.33      | 79.5        | *        |
| 20h-2      | +      | +/-     | +      | 0.32      | 16.6        |          |
| 20h-5      | +      | +       | ++     | 0.38      | 60.0        | *        |
| 20h-6      | ++     | +       | +      | 0.35      | 60.5        |          |
| 20h-sh1    | +/-    | +       | +      | 0.32      |             | *        |
| 20h-sh2    | +/-    | +       | +      | 0.34      |             | *        |
| 4d-1       | +      | ++      | +      | 0.38      | 62.6        |          |
| 4d-2       | +      | ++      | +/-    | 0.43      | 56.6        |          |
| 4d-4       | ++     | ++      | +      | 0.45      | 62.4        | *        |
| 4d-5       | ++     | +       | +      | 0.44      | 67          | *        |
| 14d-1      | +/-    | ++      | +/-    | 0.51      | 88.7        |          |
| 14d-2      | +      | ++      | +/-    | 0.6       | 87          | *        |
| 14d-3      | +      | +       | +/-    | 0.62      | 119         | *        |
| 14d-6      | +/-    | +       | +/-    | 0.42      | 92.16       |          |
| Control 0h | -      | ++      | +/-    | 0.35      |             | *        |

**Note:** Mice: sh = sham. LV/BW = Left ventricle weight / Body weight Index. P.G. = Pressure gradient between proximal and distal intra-aortic pressure. Phosho-STAT3, phosho-ERK1/2 and phosho-p38 were detected using specific antibodies (New England Biolabs Inc. ,Beverly, Massachusetts, USA). ‘-’ = no signal, ‘+/-’ = slightly detectable signal, ‘+’ = detectable signal, ‘\*’ = mouse selected for DNA chip experiment.
