# Supplementary material
Source: PubMed Central journal article supplement (PMC526469)
Supplement: 7600454s4.pdf [file 7600454s4.pdf]

**Supplementary data: Table V.** STAT3 activation and hypertrophic response 4 days after TAC in ventricular-restricted gp130 knock-out mice and wild-type littermate.

| Mice  | Genotype | pSTAT3 | LV/BW [%] | P.G. [mmHg] | DNA chip |
|-------|----------|--------|-----------|-------------|----------|
| Gp758 | WT       | ++     | 0.45      | 48.2        | *        |
| Gp775 | WT       | +/-    | 0.37      | 27.9        |          |
| Gp780 | WT       | +      | 0.50      | 58.2        | *        |
| Gp784 | WT       | +      | 0.41      | 32.7        |          |
| Gp762 | KO       | +      | 0.47      | 62.3        |          |
| Gp768 | KO       | +      | 0.43      | 43.9        |          |
| Gp776 | KO       | +/-    | 0.47      | 66.3        | *        |
| Gp783 | KO       | +/-    | 0.57      | 57.0        |          |
| Gp788 | KO       | -      | 0.44      | 68.9        | *        |

Note: LV/BW = Left ventricle weight / Body weight Index. P.G. = Pressure gradient between proximal and distal intra-aortic pressure. Phosho-STAT3 was detected using specific antibodies (New England Biolabs Inc. ,Beverly, Massachusetts, USA). '-' = no signal, '+/-' = slightly detectable signal, '+' = detectable signal, '++' = strong signal. '\*' = mouse selected for DNA chip experiment.
