# Supplementary material
Source: PubMed Central journal article supplement (PMC526469)

**Supplementary data: Figure 4H.** TUNEL and DAPI staining of cells expressing GFP or SPRR1A and kept 24 hours in the presence of 2-deoxyglucose with or without CT-1.

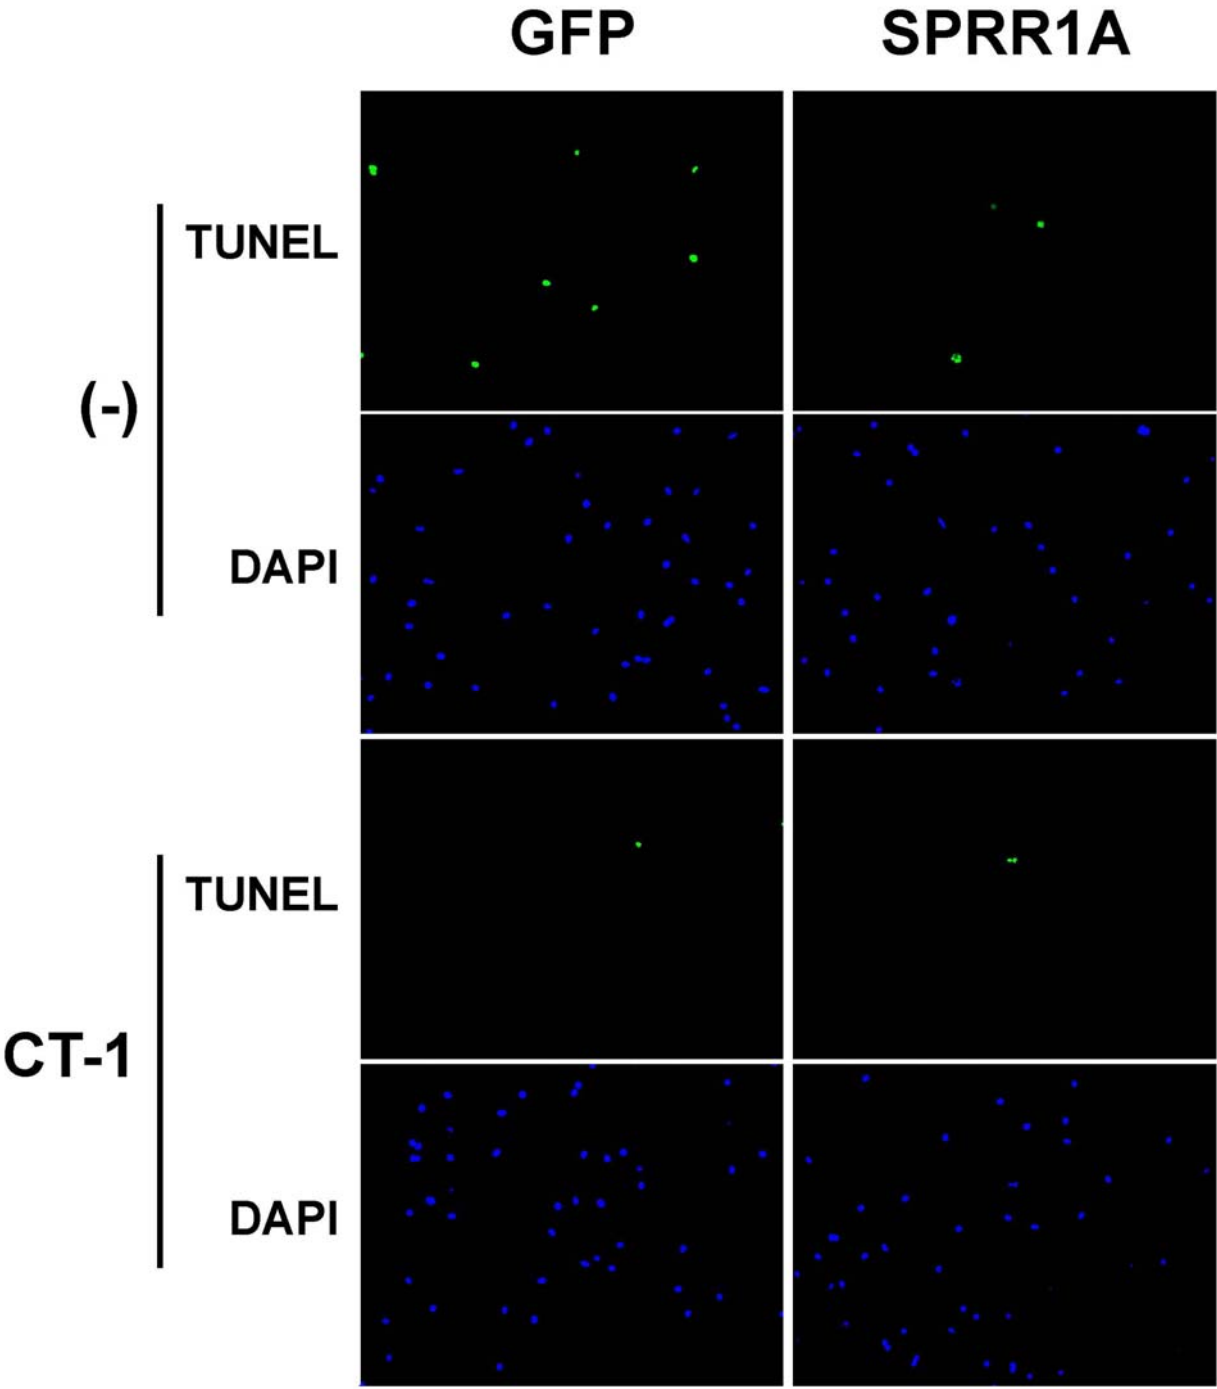

Supplement: 7600454s5.pdf [file 7600454s5.pdf]
